# Supplementary material
Source: MDPI journal article supplement (https://www.mdpi.com/2073-4344/11/12/1449)
Supplement: s1 [file s1]

Supplementary materials

# Synthesis of Ce/MgO Catalysts for Direct Oxidation of *Hibiscus cannabinus* Stalks to Vanillin

Nur Akila Syakida Idayu Khairul Anuar <sup>1,2</sup>, Anita Ramli <sup>1,2,\*</sup> and Lim Jun Wei <sup>1,2</sup>

<sup>1</sup> Fundamental and Applied Sciences Department, Universiti Teknologi PETRONAS, Seri Iskandar 32610, Perak, Malaysia; nur\_18003521@utp.edu.my (N.A.S.I.K.A.); junwei.lim@utp.edu.my (L.J.W.)

<sup>2</sup> HICOE Centre for Biofuels and Biochemicals Research, Universiti Teknologi PETRONAS, Seri Iskandar 32610, Perak, Malaysia

\* Correspondence: anita\_ramli@utp.edu.my; Tel.: +60-5368-7639

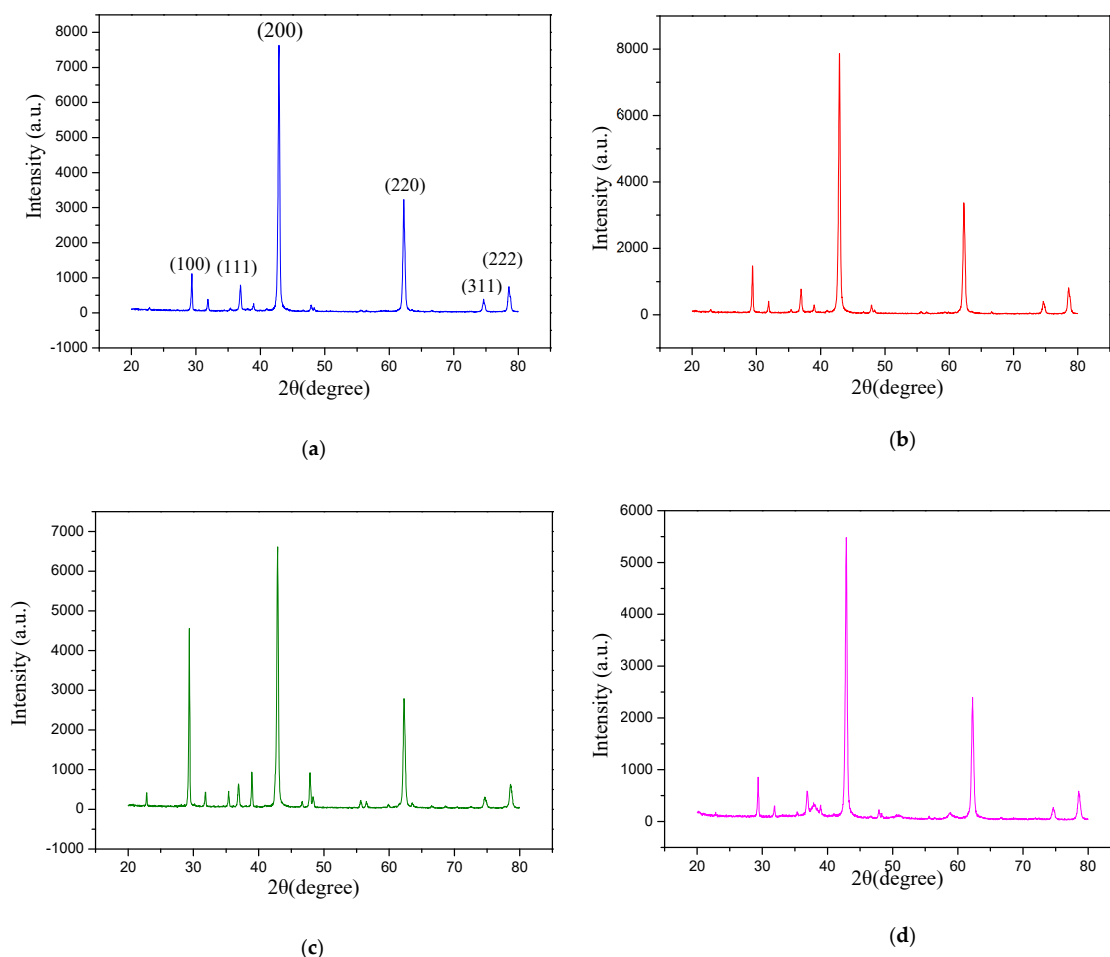

**Figure S1.** X-ray diffraction patterns of MgO. (a) MgO-18; (b) MgO-36; (c) MgO-48; (d) MgO-SG

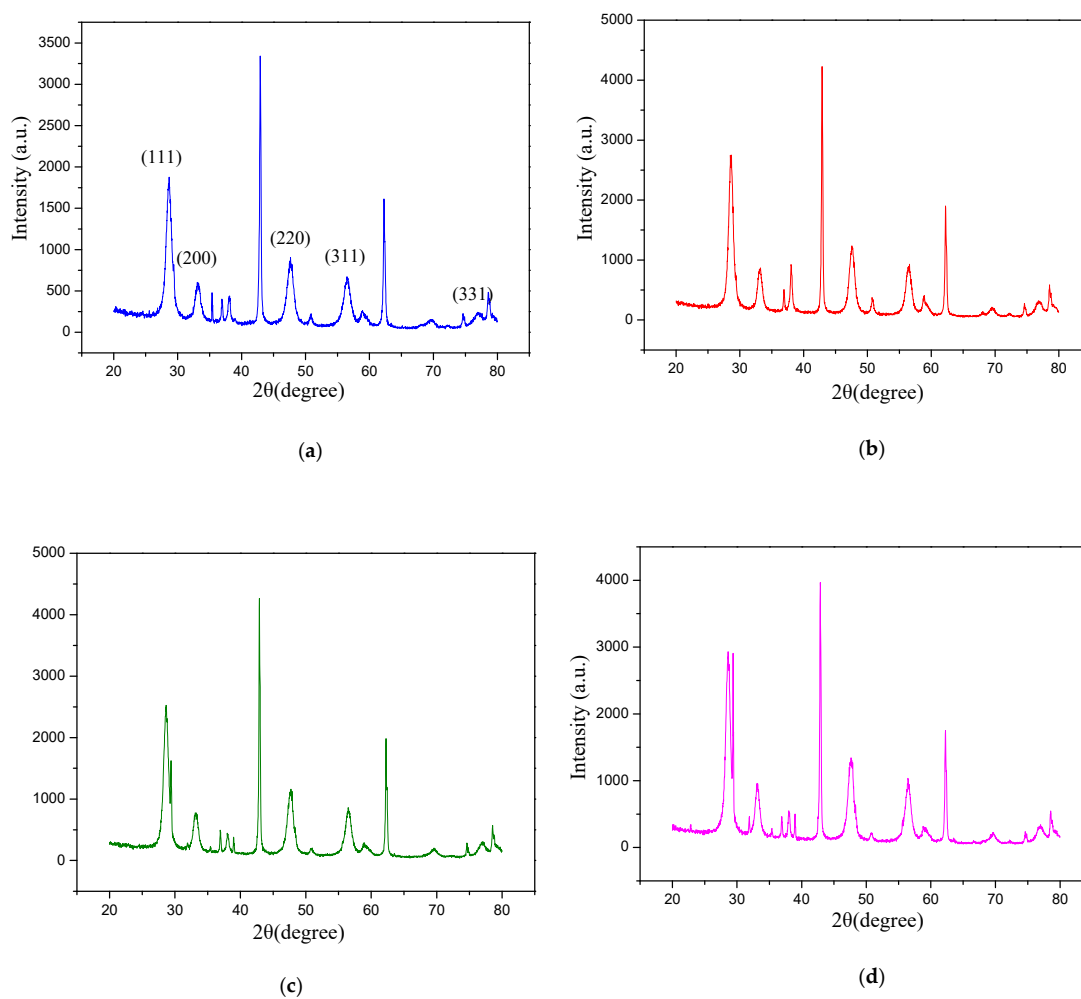

**Figure S2.** X-ray diffraction patterns of 30Ce/MgO. (a) 30Ce/MgO-18; (b) 30Ce/MgO-36; (c) 30Ce/MgO-48; (d) 30Ce/MgO-SG.

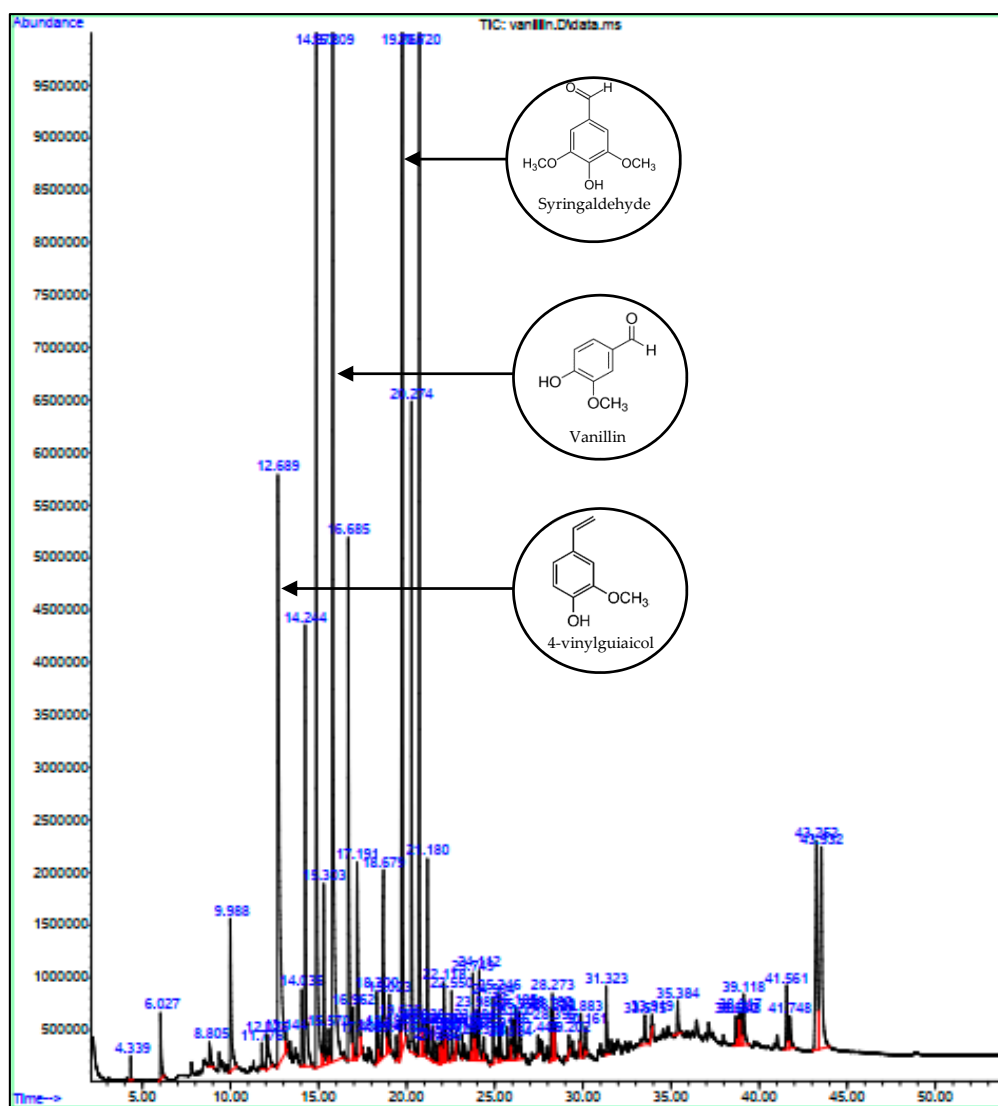

Figure S3. Gas-chromatogram of degradation wood product.
